# Supplementary material
Source: publisher figshare collection journal article supplement (https://acs.figshare.com/ndownloader/files/9012040)
Supplement: Supplementary file 1 [file 9012040]

**Supporting Information for:**  
**Comprehensive Proteomic Analysis of PGC7-Interacting Proteins**

*Liu Hongliang<sup>†,‡</sup>, Zhang Lei<sup>†,‡</sup>, Wei Qing<sup>†,‡</sup>, Shi Zhaopeng<sup>†,‡</sup>, Shi Xiaoyan<sup>‡,§</sup>,*

*Du Juan<sup>‡,||</sup>, Huang Chenyang<sup>†,‡</sup>, Zhang Yong<sup>†,‡</sup>, Guo Zekun<sup>\*†,‡</sup>*

<sup>†</sup>College of Veterinary Medicine, Northwest A&F University, Yangling, Shaanxi  
712100, China

<sup>‡</sup>Key Laboratory of Animal Biotechnology, Ministry of Agriculture, Northwest A&F  
University, Yangling, Shaanxi 712100, China

<sup>§</sup>Medical Experiment Center of Shaanxi University of Chinese Medicine, Xianyang,  
Shaanxi, 712000, China

<sup>||</sup>Medicine School of Yan'an University, Yan'an, Shaanxi, 716000, China

**\*Correspondence to:**

Prof. Guo Zekun

College of Veterinary Medicine

Northwest A&F University

Yangling, Shaanxi, 712100

China

Tel.: (86)29-87080092;

Fax: (86)29-87080085.

E-mail: gzk@nwsuaf.edu.cn

# List of Supporting Information

## Supplemental Figures

**Figure S1:** Validation of biotinylation of PGC7 by transient transfection.

**Figure S2:** Detection of cellular localization of tagged PGC7.

**Figure S3:** Separation of PGC7 interacting proteins in 293T cells by SDS-PAGE.

## Supplemental Tables

**Table S1:** The complete list of 291 identified interacting proteins of PGC7 (Provided as separate file).

**Table S2:** GO and KEGG enrichment analysis of PGC7-interacting proteins (Provided as separate file).

**Table S3:** The COG function classification of PGC7-interacting proteins (Provided as separate file).

**Table S4:** Protein network analysis of PGC7-interacting proteins by using STRING database by MCODE (Provided as separate file).

**Table S5:** Detailed peptide data for PGC7 interacting proteins identified by LC-MSMS (Provided as separate file).

## Supplemental Data

**Supplemental Data S1:** The result files of protein identification using Mascot software. (Provided as separate Zip file)

**Figure S1**

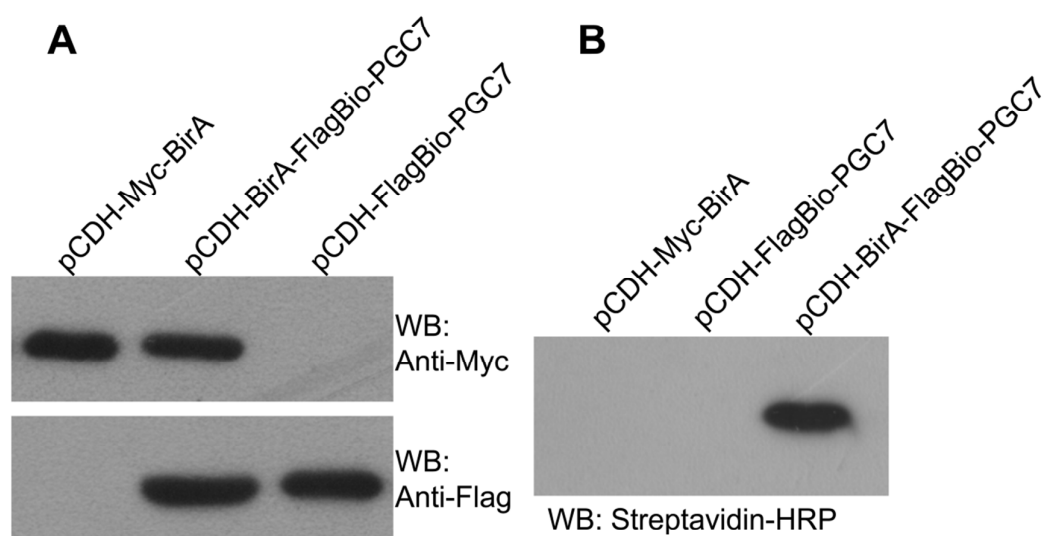

**Figure S1** Validation of biotinylation of PGC7 by transient transfection

(A) Validation of BirA and FlagBio-PGC7 expression by western blotting. HEK293T cells were transfected with pCDH-Myc-BirA, pCDH-FlagBio-PGC7 and pCDH-BirA-FlagBio-PGC7 for 48 h, and then the whole cell lysates were assayed by western blotting for detection of Myc-tagged BirA and FlagBio-tagged PGC7.

(B) Validation of biotinylated PGC7 by western blotting. HEK293T cells were transfected with pCDH-Myc-BirA, pCDH-FlagBio-PGC7 and pCDH-BirA-FlagBio-PGC7 for 48 h, and then the streptavidin-HRP was used to detect biotinylated protein by western blotting.

**Figure S2**

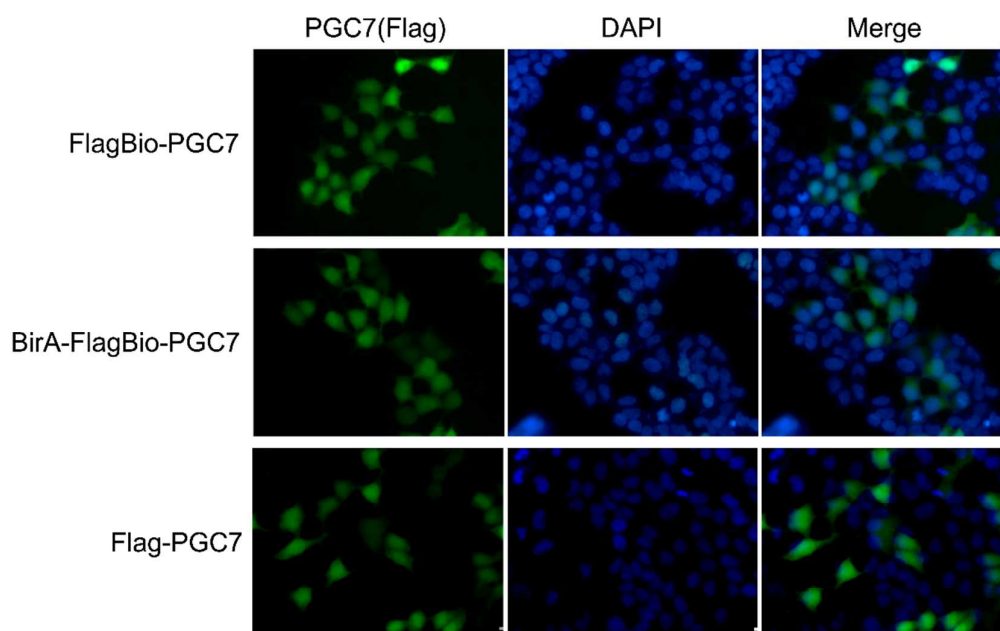

**Figure S2** Detection of cellular localization of tagged PGC7.

HEK293T cells were transfected with pCDH-FlagBio-PGC7, pCDH-BirA-FlagBio-PGC7 and pCDH-Flag-PGC7 for 48 h, and then analyzed by immunofluorescence using antibodies against Flag. The nuclei were stained with DAPI. There is no change between nonbiotinylated (FlagBio-PGC7) and biotinylated PGC7 (BirA+ FlagBio-PGC7) protein in cellular distribution. There is also no change between PGC7 protein with (FlagBio-PGC7) and without (Flag-PGC7) Bio-tag.

**Figure S3**

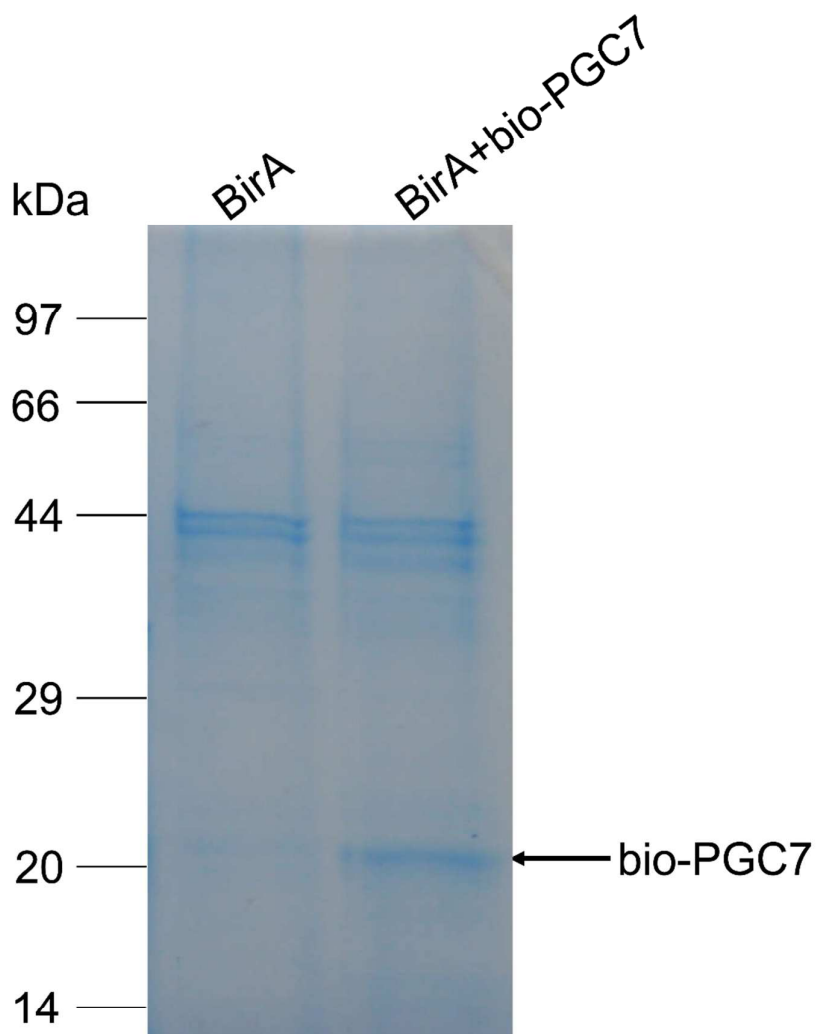

**Figure S3** Separation of PGC7 interacting proteins in 293T cells by SDS-PAGE.

The gel was stained with Coomassie blue, and bands were excised and subjected to LC-MS/MS analysis. The “BirA + bio-PGC7” gel lane was used for the identification of PGC7-interacting proteins. The “BirA” gel lane served as control for background signals.
